# Supplementary material for: Insights into spatiotemporal dynamics of riverine water age and its controlling factors in five contrasting subtropical headwater catchments, South-Central China using stable water isotopes
Source: Copernicus journal article supplement (doi:10.5194/egusphere-2025-1739), 2025-05-27
Supplement: Supplementary file [file 2025-07-04LKW-WHW.pdf › 2025-07-04LKW-WHW.pdf]

**Insights into spatiotemporal dynamics of riverine water age and its controlling factors in subtropical headwater catchments, South-Central China using stable water isotopes**

Kaiwen Li<sup>1,2</sup>, Huawu Wu<sup>1,2</sup>, Jing Li<sup>3</sup>, Mengyao Ding<sup>2,4</sup>, Ruiyu Lei<sup>2,4</sup>, Lihui Tian<sup>5</sup>, Hongxiang Fan<sup>2</sup>, Congsheng Fu<sup>2</sup>, Rongrong Wan<sup>2</sup>, Guishan Yang<sup>1,2</sup>

1 The National Key Laboratory of Water Disaster Prevention, Hohai University, Nanjing, China

2 Key Laboratory of Lake and Watershed Science for Water Security, Nanjing Institute of Geography and Limnology, Chinese Academy of Sciences, Nanjing, China.

3 School of Geographic Information and Tourism, Chuzhou University, Chuzhou, China

4 University of Chinese Academy of Sciences, Beijing, China.

5 State Key Laboratory of Plateau Ecology and Agriculture, Qinghai University, Xi'ning, China.

**Abstract:** Understanding river water age and its controlling factors are fundamental for comprehending catchment hydrological and biogeochemical processes. However, how do landscape characteristics and climate properties control the spatiotemporal heterogeneity of riverine water age remain to be further clarified in subtropical headwater catchments. This study used stable isotopic ratios ( $\delta D$  and  $\delta^{18}O$ ) from three contrasting headwater catchments. The study explored time-variable young ( $F_{yw}$ ) and new ( $F_{new}$ ) water fraction among three contrasting headwater catchments from the upper reaches of Xiu River, located within the Poyang Lake catchment of South-Central China using stable isotopes ( $\delta D$  and  $\delta^{18}O$ ) from 2021 to 2023. The isotopic compositions of precipitation exhibited greater fluctuations than those of river water from three sub-catchments. The lower slopes (3.78 to 5.08) and intercepts (-13.12 to -2.93) of linear regression correlations between  $\delta D$  and  $\delta^{18}O$  were observed in river water compared to the global and local meteoric water lines, indicating significant evaporation effects on river water. The young water fraction ( $F_{yw}$ ) showed considerable spatial variability ranging from 0.07 to 0.21 among three sub-catchments, suggesting the dominant recharge of groundwater to the river. The pronounced temporal variations of  $F_{yw}$  highlighted its susceptibility to short-term hydroclimatic change. Random forest models revealed that precipitation ( $12.94 \pm 1.51\%$ ) and potential evapotranspiration ( $12.38 \pm 9.25\%$ ) were the primary drivers for young and new water generation. Furthermore,  $F_{yw}$  was significantly influenced by precipitation ( $13.27 \pm 1.99\%$ ), whereas  $F_{new}$  was more susceptible to the influence of evapotranspiration (22.98%)

and cropland (14.65%). Shapley Additive Explanations revealed a negative correlation between both discharge density and river area with  $F_{yw}$ , and a positive interaction effect between agricultural area and PET on  $F_{new}$ . Combined with the dynamic variations of  $F_{yw}$  and  $F_{new}$ , these results indicated that the regulatory function of riparian zones played a crucial role in young water generation, while land use changes significantly altered the process of new water generation. Our findings suggest that intensified evapotranspiration and increased precipitation will significantly impact the generation of riverine young and new water in the context of global warming and land use type changes.

**Keywords:** Stable water isotopes; Young water fraction; New water fraction; Random Forest model; Poyang Lake catchment

## 1. Introduction

Stable isotopes ( $\delta^{18}O$  and  $\delta D$ ) have been widely used as ideal tracers to elucidate different sources of stream flow, assess the variability of this source partitioning with precipitation characteristics, and evaluate the origin and age of river water (Ide et al., 2020; Morissette et al., 2023; Valdivielso et al., 2020). Water age serves as a valuable descriptor of specify storage, routes, and differential source waters within catchments, bearing significant implications for the management of water resources in terms of both quantity and quality (Benettin et al., 2020). Mean transit time (MTT) and young water fraction ( $F_{yw}$ , the proportion of water younger than two or three months) are two crucial water age metrics, that have been extensively employed in hydrological researches (Jasechko et al., 2016; Speed et al., 2011; Xiao et al., 2021). These metrics integrate flow path heterogeneity and directly relate to internal catchment processes, which differs in each catchment depending on the landscape, climatic parameters and human activities within each catchment. Furthermore, Kirchner (2019) proposed a method using a modified mixing model to estimate the new water fraction ( $F_{new}$ , the proportion of water younger than one or two weeks). When used together,  $F_{yw}$  and  $F_{new}$  offer complementary methods for estimating water origins and different flow paths (Burt et al., 2023). Although several studies have investigated the relationships between catchment topography and water age (Clow et al., 2018; Jasechko et al., 2016), few have expanded the analysis to encompass

a wide range of controlling factors and assessed the influence of the selected calculation methods. Given the paucity of such studies, there is a need for a more comprehensive appraisal the relationships between landscape and hydro-climatic factors with water age metrics through nested catchment investigations.

$F_{yw}$  is defined as the fraction of streamflow younger than a specified threshold and is used to quantify the proportion of precipitation input that is rapidly converted into runoff as fast flow (Kirchner, 2016). This metric is independent of old water components and is negligibly affected by aggregation bias compared to MTT (Kirchner, 2016). Therefore,  $F_{yw}$  is increasingly used to study hydrological processes in highly heterogeneous catchments. Substantial research efforts have focused on elucidating the relationships between  $F_{yw}$  and intrinsic catchment characteristics such as topographic metrics (Jasechko et al., 2016), geology (Wang et al., 2023), and soil characteristics (Ye et al., 2022) to identify potential controlling factors. For example, several studies have found that high-gradient or high-elevation catchments tend to exhibit lower  $F_{yw}$  values (Jasechko et al., 2016; Song et al., 2017), whereas other studies have reported the opposite relationship (Clow et al., 2018; Zhang et al., 2018). Hence,  $F_{yw}$  is characterized by highly spatial heterogeneity and complex controlling factors, constraining the understanding of catchment hydrological processes. Furthermore, studies have emphasized that the distribution of fast and slow flow paths is subject to temporal variability (Harman, 2015; Kim et al., 2016), suggesting that the characteristics of river water age can change over time. von Freyberg et al (2018) utilized flow-weighted fits of seasonal tracer cycles to predict the flow-weighted average young water fraction ( $F^*_{yw}$ , compared to the unweighted  $F_{yw}$ ) (von Freyberg et al., 2018). Their study illustrated dynamic temporal variability in  $F_{yw}$  within sites but found no clear relationship between catchment gradient and  $F^*_{yw}$ . Generally, when examining the effects of hydroclimatic variables (e.g., precipitation and evapotranspiration) and landscape characteristics (e.g., elevation) on  $F_{yw}$ , single-variable correlations should be interpreted with caution, as they may be confounded by cross-correlations among many potential drivers (Lutz et al., 2018). Thus, it remains unclear that which of these variables exert a first-order control on  $F_{yw}$  in subtropical catchments with highly variable precipitation and complex landscapes properties.

87 As the largest freshwater lake in China, Poyang Lake is dominated by a typically subtropical climate  
88 and serves as a crucial floodwater storage area for the Yangtze River. Hence, it plays a vital role in  
89 the management and ecological conservation of the Yangtze River Catchment. The intricate  
90 hydrological exchanges between the lake, its three tributary rivers, and the Yangtze River leads to  
91 significant intra-annual variations in the water level of Poyang Lake, driven by highly precipitation  
92 variability. In recent years, significant changes in the hydrological characteristics of Poyang Lake  
93 have occurred due to the combined effects of natural factors and human activities. These changes  
94 are marked by earlier onset of dry seasons, rapid declines in water levels during autumn and winter,  
95 prolonged dry spells, and consistently low water levels. For example, in 2022, a severe drought  
96 caused an unusual phenomenon of low water levels during the flood season (Guan et al., 2022). The  
97 complex hydrological regime necessitates a thorough understanding of the origins of streamflow in  
98 the headwater catchment and their potential changes under future climates. However, this  
99 complexity also poses challenges for numerical simulations and traditional hydrological monitoring  
100 methods in depicting these hydrological processes. Thus, it is necessary to employ isotope  
101 techniques to analyze these processes. Current isotope analysis in Poyang Lake catchment have  
102 primarily focused on groundwater recharge within the catchment (Mao et al., 2021) and the  
103 interaction between Poyang Lake and the Yangtze River (Wu et al., 2021). However, limited  
104 research has been conducted on the transportation and storage dynamics of headwater rivers that  
105 feed into lakes. Specifically, there is a need to understand the proportion of streamflow originating  
106 from old water stored in subsurface layers versus new water derived from recent precipitation. It  
107 likewise remains unclear how these slow and fast flow processes, and thus the partitioning of old  
108 and new water in headwater streams, relate to hydroclimatic forcing and physical catchment  
109 characteristics.

110  
111 To address the aforementioned knowledge gaps, this study conducted continuous observations of  
112 precipitation and river water isotopes over two years in three contrasting headwater catchments from  
113 the upper reaches of Xiu River, located in Poyang Lake Catchment, South-Central China. We  
114 explored the seasonal isotope cycles of water components in the catchment and used an array of  
115 potential drivers of riverine water age metrics to achieve the following objectives: 1) examine the

characteristics of stable isotopes among three contrasting sub-catchments; 2) compare water age metrics across different catchments using different calculation methods; 3) identify the relative importance of different factors controlling young and new water fraction.

## **2. Materials and methods**

### **2.1 Study area**

Poyang Lake Catchment, covering the entire Jiangxi Province in South-Central China, is connected to the mid- and lower reaches of the Yangtze River (Figure 1). This region is dominated by a subtropical humid monsoon climate with mild temperatures, abundant rainfall, ample sunlight, and a prolonged frost-free period. The four seasons are distinct, with cold and dry winters, and summers influenced by the subtropical anticyclone, characterized by hot and sunny weather with occasional typhoon impacts. The average annual rainfall is 1655.9 mm, which is unevenly distributed throughout the seasons and mainly concentrated during the flood season (April to September), accounting for 60-70% of the annual rainfall. Influenced by inflows from the “Five rivers” (e.g., Gan River, Fu River, Xin River, Rao River, and Xiu River), Poyang Lake is characterized by a typical water conveyance-type lake, which is connected to large river systems that subsequently flow into the Yangtze River after being regulated and stored (Li et al., 2016). During high water-level periods, Poyang Lake exhibits lake-like characteristics from April to September, while it resembles a river during low water-level periods from December to January (Wu et al., 2021). Furthermore, the temporal and spatial distribution of precipitation throughout the year has become increasingly uneven. Particularly since June 2022, the region has witnessed the most intense heatwave event in terms of overall intensity since complete observational records began in 1961 (Guan et al., 2022).

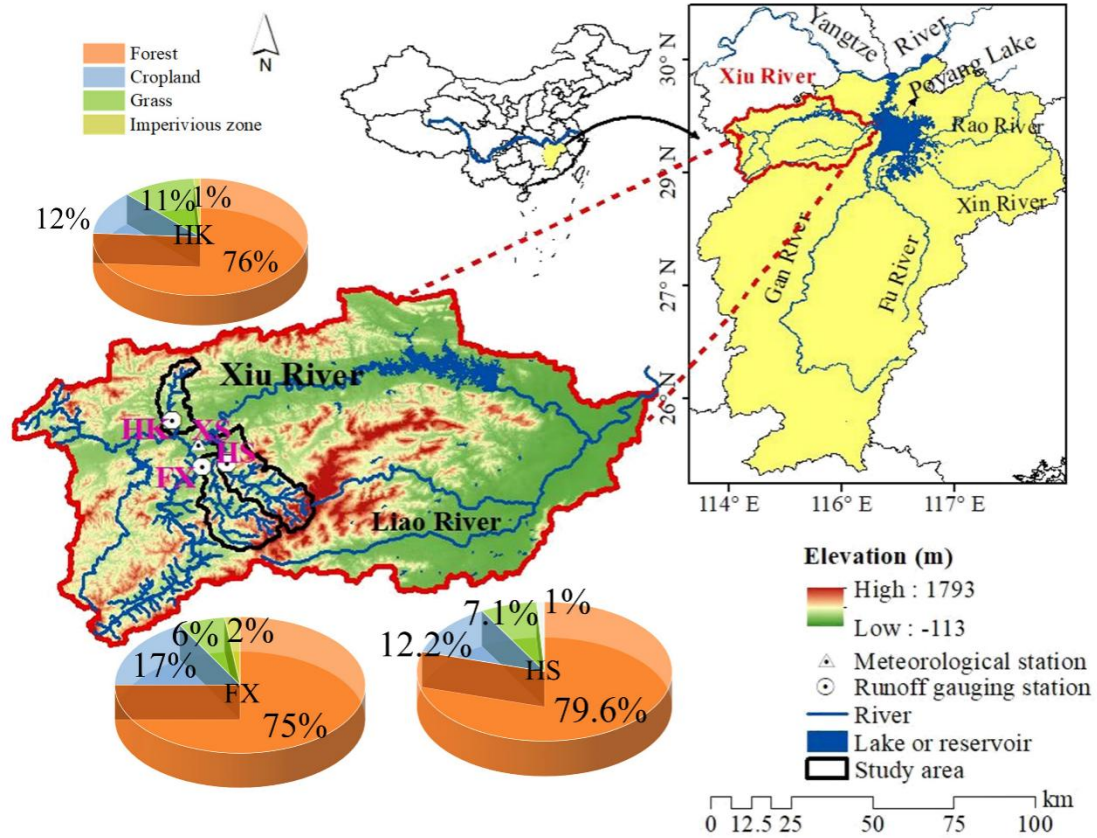

Figure 1 Geographical location and catchment properties (e.g., topography and land use) of the study area. HK, FX, and HS represented the Hangkou, Fengxiang, and Huangsha basins, respectively. XS was precipitation isotope observation station in Xiushui County.

The Xiu River catchment is located in the western part of Poyang Lake, covering area of 14,797 km<sup>2</sup> with 8.3 % of the total area of Poyang Lake catchment (Figure 1). The three sub-catchments of HS, HK, and FX within Xiu River catchment represent the Huangsha, Hangkou, and Fengxiang catchments, respectively, spanning from 281.22 km<sup>2</sup> to 662.25 km<sup>2</sup>. Geomorphological and hydrological characteristics of the study sites are reported in Table 1. During the study period, the multi-year average rainfall of 1638.4 mm/year, of which 55 % is occupied in March to June. The mean annual evapotranspiration is 1049 mm/year, with peak rates occurring during May and September. The primary land use type in the study area is forest (Figure 1). This is followed by cropland, with smaller areas for grassland, urban centers, and open water bodies. The proportion of forested area within the study area varies from 76 % to 79.6 %. Huangsha catchment (HS) shows the highest proportion of forest cover whereas Hangkou catchment (HK) exhibits the lowest proportion of forested area (Figure 1). Regarding soil type, red soil dominates at 24 %, accompanied

by paddy soil at 7.1 % and yellow soil at 7.2 %.

Table1 Detailed information of the sampling sites and catchment properties.

| Station  | Catchment               | Lon.<br>(°) | Lat.<br>(°) | Area<br>(km <sup>2</sup> ) | Flow length<br>(km) | TWI | Slope<br>(°) | Drainage<br>density<br>(km/km <sup>2</sup> ) |
|----------|-------------------------|-------------|-------------|----------------------------|---------------------|-----|--------------|----------------------------------------------|
| Chaiduan | Hangkou<br>River (HK)   | 114.4       | 29.1        | 281.2                      | 37.6                | 6.6 | 15.5         | 0.2                                          |
| Chijiang | Fengxiang<br>River (FX) | 114.6       | 28.9        | 586.2                      | 56                  | 6.7 | 17.2         | 0.3                                          |
| Huangsha | Huangsha<br>River (HS)  | 114.6       | 28.9        | 662.3                      | 71.4                | 6.3 | 18.3         | 0.3                                          |

Notes: TWI (Topographic Wetness Index), represented the influence of land elevation on the direction and accumulation of runoff. It was calculated using the formula:  $TWI = \ln(A/\tan\beta)$ , where A was the specific catchment area (drainage area per unit contour length), and  $\beta$  was the slope of the terrain derived from the digital elevation model (DEM).

## 2.2 Water sampling and other data sources

Isotopic sampling campaigns were conducted over two hydrological years (December 2021–December 2023). A total of three river water sampling points were performed in the study area (Figure 1), which was entrusted to the staff of hydrological gauging stations in the study area (Chaiduan, Chijiang, and Huangsha, Table 1). Weekly grab samples for  $\delta^{18}\text{O}$  and  $\delta\text{D}$  were collected with a total of 93–109 samples at each site. Samples were collected with a 1-L stainless steel sampler dipped in the middle of the current flow at depths below 15 cm. All bottles were fully filled and then transferred to clean and dry 50-mL polyethylene bottles, which were sealed immediately and stored in refrigerator to avoid isotopic fractionation prior to analysis. In addition, daily precipitation amounts were recorded by Xiushui County meteorological station (XS, Figure 1), 268 event-based precipitation samples were collected from November 2021 to December 2023. Each sample was collected as soon as a precipitation event stopped to reduce evaporation.

Stable isotopes ( $\delta^{18}\text{O}$  and  $\delta\text{D}$ ) of all water samples were measured by a Laser Absorption Water-

Vapor Isotope Spectrometer (Model 908-0004, Los Gatos Research, Mountain View, CA, USA) in the State Laboratory of Nanjing Institute of Geography and Limnology, Chinese Academy of Sciences. Measured results are reported as  $\delta^{18}\text{O}$  and  $\delta\text{D}$  in ‰ relative to the Vienna Standard Mean Ocean Water (V-SMOW). Isotopic ratios ( $\delta\text{D}$  and  $\delta^{18}\text{O}$ ) are expressed using the conventional delta notation ( $\delta$ ):  $\delta_{\text{sample}} = (R_{\text{sample}} / R_{\text{V-SMOW}} - 1) \times 1000\text{‰}$ , where  $R_{\text{sample}}$  and  $R_{\text{V-SMOW}}$  are the isotope ratios ( $^2\text{H} / ^1\text{H}$ ,  $^{18}\text{O} / ^{16}\text{O}$ ) of water samples and V-SMOW, respectively. The precision of the isotopic analysis is  $\pm 0.2\text{‰}$  for  $\delta^{18}\text{O}$  and  $\pm 0.6\text{‰}$  for  $\delta\text{D}$ . Lastly, d-excess ( $\text{d-excess} = \delta\text{D} - 8\delta^{18}\text{O}$ ) of the precipitation and river water was calculated using the slope and intercept of the global meteoric water line, as an important indicator of the difference in kinetic fractionation, which results from different diffusivities of water isotopes during water phase changes (Bagheri et al., 2019).

We used the HydroATLAS database to extract hydrological attributes of the catchment, including soil water content (SWC), stream gradient (SG), river area (RA), and the Global Aridity Index (GAI), among others. Additionally, potential evapotranspiration (PET) was calculated using the Penman equation. Soil type data were sourced from the HWED global soil database, developed by FAO and IIASA. Land use data for the 2020 were obtained from the National Land Cover dataset provided by the Institute of Remote Sensing and Digital Earth, Chinese Academy of Sciences, with a spatial resolution of 30m. The DEM data of SRTM30 was jointly measured by the National Imaging and Mapping Agency (NIMA) of the U.S. Department of Defense and NASA, with a spatial resolution of 30m. Flow Length was calculated as the distance along the flow path from each point in the catchment to the outlet. This was determined using the DEM to derive the flow direction, which was then used to trace the flow path and compute the cumulative length of the flow lines.

### **2.3 Young water fraction ( $F_{\text{yw}}$ ) estimation**

This study employed the sine-wave method to estimate  $F_{\text{yw}}$ , following the methodology outlined by Kirchner (2016). Specifically, we will use the termed  $F_{\text{yw\_all}}$  to denote  $F_{\text{yw}}$  derived from utilizing a single sine wave for the entire 2-year time series of precipitation and streamflow isotope data. The amplitude and phase shift of seasonal cycles in water isotopes offer an objective representation of the input-output dynamics within catchments. This approach assumes that the seasonal isotope



pattern in precipitation is mirrored in river water with a damped and delayed signal. The mathematical expression for the sine-wave approach describing the seasonal cycles of river water and precipitation isotopes is as follows:

$$C_p(t) = a_p \cos(2\pi ft) + b_p \sin(2\pi ft) + k_p \quad (1)$$

$$C_s(t) = a_s \cos(2\pi ft) + b_s \sin(2\pi ft) + k_s \quad (2)$$

In the equation provided, the subscripts "s" and "p" correspond to river water and precipitation, respectively.  $C_p(t)$  and  $C_s(t)$  are the  $\delta D$  of the precipitation and streamflow, respectively.  $f$  indicates the frequency of the cycle ( $f = 1$  for a seasonal cycle);  $t$  signifies time (years with decimal fractions), utilized as an independent variable for fitting isotopic seasonal fluctuations; the sine curves of Eq.(1) and (2) are fitted on the isotope measurements using the iteratively re-weighted least squares (IRLS) method (for reducing the influence of outliers), which leads to estimates of  $A$ ,  $\phi$  and  $k$  parameters ( $k$  is the vertical offset of the seasonal isotope cycle), and  $a_p$ ,  $b_p$ ,  $a_s$ ,  $b_s$  are coefficients for determining the amplitude ( $A$ ) and phase shift ( $\phi$ ) of the seasonal  $\delta D$  of precipitation and streamflow, which are calculated as follows:

$$A_p = \sqrt{a_p^2 + b_p^2}, \quad A_s = \sqrt{a_s^2 + b_s^2} \quad (3)$$

$$\phi_p = \tan^{-1}\left(\frac{a_p}{b_p}\right), \quad \phi_s = \tan^{-1}(a_s/b_s) \quad (4)$$

Here,  $\alpha$  represents a shape factor in the transit-time distribution equation, which can be derived from the phase shift and amplitude ratio between precipitation and streamflow. By successively solving the relationship between the gamma distribution parameters ( $\alpha$  and  $\beta$ ) and the amplitude ratio  $A_s/A_p$  as well as the phase shift  $\phi_p - \phi_s$ , the values for  $\alpha$  and  $\beta$  can be determined using Eqs. (5)-(7) (Kirchner, 2016):

$$\phi_s - \phi_p = \alpha \tan^{-1} \sqrt{(A_s/A_p)^{-2/\alpha} - 1} \quad (5)$$

$$\frac{A_s}{A_p} = (1 + (2\pi f \beta)^2)^{-\frac{\alpha}{2}} \quad (6)$$

$$\beta = \frac{1}{2\pi f} \sqrt{(A_s/A_p)^{-2/\alpha} - 1} \quad (7)$$

The threshold age ( $\tau_{yw}$ ) of  $F_{yw}$  can be calculated using the shape parameter  $\alpha$  as follows (Kirchner, 2016a):

$$\tau_{yw} = 0.0949 + 0.1065\alpha - 0.0126\alpha^2 \quad (R^2=0.9998) \quad (8)$$

Kirchner (2016) designed the  $F_{yw}$  as the proportion of the transit time distribution younger than a

threshold age ( $\tau_{yw}$ ). By assuming that the transit time distribution mathematical form is the regularized lower incomplete gamma function for all the study catchments, the theoretical  $F_{yw}$  can be expressed as

$$F_{yw} = \Gamma(\tau_{yw}, \alpha, \beta) = \int_{t=0}^{\tau_{yw}} \frac{\tau^{\alpha-1}}{\beta^{\alpha}\Gamma(\alpha)} e^{-\tau} d\tau \quad (9)$$

To account for the temporal heterogeneity of  $F_{yw}$ , this study uses a 1-year calculation window that was shifted in 1-month intervals to obtain 36 estimations of individual time-variable  $F_{yw}$  result ( $F_{yw\_36}$  represent the results). A minimum time-window length of 1 year was chosen to fully capture the annual isotope signal. Due to significant interannual variations in precipitation and corresponding fluctuations in streamflow, where high flows are associated with more young water and low flows with baseflow, it is reasonable to use discharge as a representative of catchment wetness to calculate flow-weighted  $F_{yw}$  within each time window (Gentile et al., 2023). Hereafter, we will use the symbol “\*” for referring to a flow-weighted variable, in order to be consistent with previous studies (Gallart et al., 2020; von Freyberg et al., 2018), to distinguish it from unweighted young water fraction ( $F_{yw}$ ). Fitting sine curves using Eq. (2) involved employing an iteratively reweighted least squares algorithm, with precipitation and runoff volumes serving as weights. Depending on whether the fit is unweighted or flow-weighted, one can obtain either an unweighted amplitude ( $A_S$ ) or a flow-weighted amplitude ( $A^*_S$ ), respectively. Such amplitudes can be used to calculate the unweighted (Eq.10) or the flow-weighted (Eq.11) young water fractions ( $F_{yw}$  or  $F^*_{yw}$ , respectively) via the “amplitude ratio approach”:

$$F_{yw} = A_S / A_P \quad (10)$$

$$F^*_{yw} = \frac{A^*_S}{A_P} \approx \frac{\sum_{i=1}^n Q(t_i) F_{yw}(t_i)}{\sum_{i=1}^n Q(t_i)} \quad (11)$$

Additionally,  $F^*_{yw\_36}$  will represent the 36 individual flow-weighted  $F_{yw}$  results using a 1-year calculation window that was shifted in 1-month intervals. The sine curves of Eqs. (1)-(2) are fitted on the isotope measurements using the IRLS method, which leads to estimate the mean and standard deviation of  $A$ ,  $\phi$  and  $k$  parameters. Additionally, we estimate the uncertainty of  $F_{yw}$ ,  $\alpha$ , and  $\tau_{yw}$  assuming all the fitted parameters having a Gaussian distribution with a standard deviation equal to regression error and we generate 1000 random samples of such parameters, and we estimate the optimal  $F_{yw}$ ,  $\alpha$ , and  $\tau_{yw}$  for each parameter set and then compute their standard deviation.

## 2.4 New water fraction ( $F_{\text{new}}$ ) estimation

To calculate the new water fraction—the fraction of river water comprised of precipitation that has fallen since the previous sampling (Kirchner, 2019)—we applied an ensemble hydrograph separation framework to the river water  $\delta D$  dataset. In this study, the average time interval between samples was seven days for riverine waters. Thus, the new water fractions represent the proportion of precipitation within each water pool or flux that fell during the preceding approximately one-week period (e.g.  $< \sim 1$  weeks). However, due to the mixing of the isotopic composition of groundwater and the evaporative fractionation that causes deviations from local precipitation isotopes, there may not be significant differences in river water isotopes before and after precipitation, which could render the mixing model applications unfeasible and thus lead to equivocal inferences about recharge origin (Murad and Mirghni, 2011). Consequently, the d-excess value was used to calculate  $F_{\text{new}}$ , which is interpreted as an indicator of non-equilibrium in the straightforward condensation-evaporation process (Craig, 1961). To determine these new water fractions, we first calculated:

$$X_{p,j} - X_{r,j-1} \quad (12)$$

where  $X_{p,j}$  represented deuterium isotope composition or deuterium-excess of precipitation at a given sampling time point  $j$ , while  $X_{r,j-1}$  represented deuterium isotope composition or deuterium-excess of river water at previous sampling time point,  $j-1$ . We then calculated:

$$X_{r,j} - X_{r,j-1} \quad (13)$$

where  $X_{r,j}$  represented deuterium isotope composition or deuterium-excess of river water at a given sampling time point  $j$ . We calculated Eq. (12) and (13) for all river water sampling time points and generated a scatterplot with the results of Eq. (12) on the x-axis and Eq. (13) on the y-axis. The new water fraction is represented by the slope of the regression line between  $x$  and  $y$ . Finally, we conducted an analysis of Pearson's  $r$  to assess the relationship between  $x$  and  $y$ . As  $F_{\text{new}}$  can be calculated for different subsets of data like  $F_{\text{yw}}$ , this study uses a 1-year calculation window that was shifted in 1-month intervals to obtain 36 estimations of individual time-variable  $F_{\text{new}}$  result ( $F_{\text{new}_36}$ ).

## 2.5 Machine learning models for identifying driving factors

To investigate the importance of the 20 most frequently used controlling factors from previous studies (Jasechko et al., 2016; Song et al., 2017; von Freyberg et al., 2018), including landscape and hydroclimatic factors, in the generation of young and new water, we performed a random forest (RF) analysis. This analysis identified the key factors that significantly affect  $F_{yw\_36}^*$ ,  $F_{yw\_36}$ , and  $F_{new\_36}$ . The 'rfPermute' package was used to conduct this analysis (Shi et al., 2023). Random forest is a non-parametric machine learning algorithm that assesses a combination of predictors. Each tree in the forest depends on the values of a random vector sampled independently, with the same distribution for all trees. The generalization error of a random forest depends on the strength of the individual regression trees and converges to a limit as the number of trees in the forest increases (Erdélyi et al., 2023). The forest's predictions are based on the average results of the decision trees, which use bootstrap sampling to reduce the possibility of overfitting (Cotton et al., 2018; Lutz et al., 2018).

Subsequently, this study uses Shapley Additive Explanations (SHAP), a game-theory-based method, to explain the predictive results of RF models and quantify the contribution of driving factors to the model output. Proposed by Lundberg and Lee, SHAP provides both global and local interpretability by evaluating each feature's marginal contribution to the model prediction. Based on Shapley values from cooperative game theory, SHAP measures a feature's contribution by averaging its marginal impact across all possible feature combinations. The formula for calculating SHAP values is as follows:

$$\varphi_i(f, x) = \sum_{S \subseteq F \setminus \{i\}} \frac{|S|!(k-|S|-1)!}{k!} (f_x(S \cup \{i\}) - f_x(S)) \quad (14)$$

Where  $\varphi_i(f, x)$  can be interpreted as the impact of the  $i$ -th factor on the prediction of the model, when given an input  $x$ .  $k$  is the number of factors influencing the model,  $F$  is the full feature set,  $S$  is a subset of features, and  $f_x(S)$  denotes the model prediction for subset  $S$ . SHAP's consistency and additive properties make it ideal for disentangling complex, non-linear relationships in environmental data. We computed SHAP (SHapley Additive exPlanations) values using the shapviz package in R to quantify the contribution of each driving factor.

### 3. Results

#### 3.1 Isotopic and hydrometric data

During the entire study period, the annual average temperature was 18.31°C, with August reaching a peak of 34°C and December recording the lowest temperature at -0.8°C. Temperature and relative humidity exhibited strong seasonal variations, displaying a remarkable anti-phase pattern (Figure S1). Moreover, temporal variations in daily precipitation, the discharge of three sub-catchments in Xiu River catchment are illustrated in Figure 2. Precipitation events primarily occurred between April and June, coinciding with the period of heaviest precipitation (>20 mm). The highest precipitation of 86.1 mm was observed on April 3, 2023, while the total annual rainfall was 1181.88mm in 2022. There was a slight increase in 2023 with an accumulated rainfall of 1314.41 mm. The discharge at four sub-catchments exhibits similar trends with precipitation fluctuation (Figure 2 c-f). These trends include higher discharge in spring and summer, contrasting with lower discharge in winter and autumn. Additionally, the discharge is highest at FX among three sub-catchments.

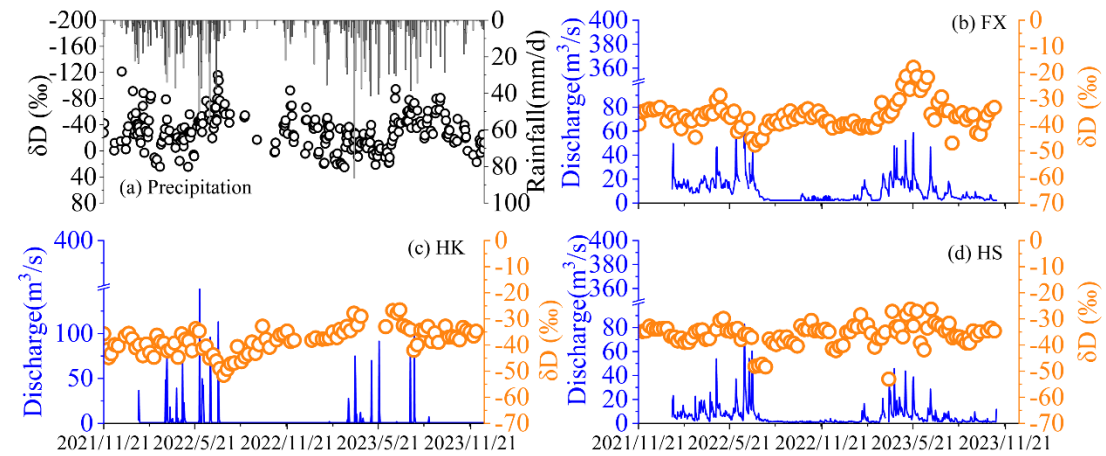

Figure 2 Time series of precipitation amount and precipitation  $\delta D$  (a), discharge and river water  $\delta D$  (b~d) from three sub-catchments ( HK, FX, and HS) during the study period.

Both precipitation  $\delta D$  and  $\delta^{18}O$  exhibited significant fluctuations over the observed periods (Figure 2a).  $\delta D$  ranged from -121.39 ‰ to 25.11 ‰ with an amount-weighted average of -34.57‰, while

$\delta^{18}\text{O}$  ranged from -16.78 ‰ to 2.91 ‰, with an amount-weighted average of -6.19‰. In contrast,  $\delta^{18}\text{O}$  and  $\delta\text{D}$  values in river water ( $\delta^{18}\text{O}$ : -9.35 to -4.36‰ and  $\delta\text{D}$ : -51.59 to -18.02‰) presented smaller variability over time compared with those in precipitation (Figure 2). From a seasonal perspective, the stable isotopes of river water and precipitation exhibited similar trends, with depletion during winter and summer and enrichment during autumn and spring (Figure 2b-d and Table 2). The isotopic content of river water showed greater variability during the high flow period of summer compared to other seasons (Table 2). There was remarkable spatial variability of  $\delta\text{D}$  values in river waters across the study area (Figure 2, Table 2). River water  $\delta\text{D}$  values showed the largest range of variations from -66.43 ‰ to -18.02 ‰ with a mean of  $-36.78 \pm 6.24$  ‰ in the FX catchment (Figure 1). In contrast, the HS exhibited the smallest range of  $\delta\text{D}$  variation from -53.06 ‰ to -35.85 ‰ with a mean of  $-35.85 \pm 4.34$  ‰.

Table 2 Seasonal variations (mean $\pm$ SD) of  $\delta^{18}\text{O}$ ,  $\delta\text{D}$ , and d-excess in precipitation and river waters from three sub-catchments (HK, FX, ZJ, PX, and HS) throughout the entire study period

| Seasons               | Isotopes                  | Precipitation  | HK              | FX            | HS             |
|-----------------------|---------------------------|----------------|-----------------|---------------|----------------|
| Winter<br>(Dec.-Feb.) | $\delta^{18}\text{O}$ (‰) | -6.5 $\pm$ 3   | -6.9 $\pm$ 1.1  | -6.5 $\pm$ 1  | -6.4 $\pm$ 0.4 |
|                       | $\delta\text{D}$ (‰)      | -31.1 $\pm$ 27 | -40.1 $\pm$ 5   | -38.2 $\pm$ 2 | -35.7 $\pm$ 3  |
|                       | d-excess (‰)              | 21.1 $\pm$ 7   | 15.6 $\pm$ 5.8  | 14.2 $\pm$ 5  | 15.5 $\pm$ 2.7 |
| Spring<br>(Mar.-May.) | $\delta^{18}\text{O}$ (‰) | -3.6 $\pm$ 2   | -6.9 $\pm$ 1    | -5.9 $\pm$ 1  | -6.4 $\pm$ 0.8 |
|                       | $\delta\text{D}$ (‰)      | -13.8 $\pm$ 20 | -36.9 $\pm$ 4   | -33 $\pm$ 6   | -34.7 $\pm$ 5  |
|                       | d-excess (‰)              | 15.5 $\pm$ 6   | 18 $\pm$ 4.6    | 14.4 $\pm$ 5  | 16.6 $\pm$ 3   |
| Summer<br>(Jun.-Aug.) | $\delta^{18}\text{O}$ (‰) | -6.2 $\pm$ 3   | -7 $\pm$ 1.4    | -6 $\pm$ 1    | -6.6 $\pm$ 0.5 |
|                       | $\delta\text{D}$ (‰)      | -31.6 $\pm$ 29 | -39.6 $\pm$ 7.5 | -38.6 $\pm$ 8 | -37.5 $\pm$ 5  |
|                       | d-excess (‰)              | 7.6 $\pm$ 5    | 16.1 $\pm$ 4.7  | 9.4 $\pm$ 3   | 15.4 $\pm$ 2.5 |
| Autumn<br>(Sep.-Nov)  | $\delta^{18}\text{O}$ (‰) | -5.6 $\pm$ 3   | -6 $\pm$ 0.7    | -5.8 $\pm$ 1  | -6.2 $\pm$ 0.5 |
|                       | $\delta\text{D}$ (‰)      | -28 $\pm$ 26   | -37.2 $\pm$ 3   | -36.5 $\pm$ 3 | -35.7 $\pm$ 2  |
|                       | d-excess (‰)              | 14.7 $\pm$ 8   | 10.5 $\pm$ 3    | 10 $\pm$ 6    | 14.2 $\pm$ 3.6 |

The slope of the local meteoric water line (LMWL) in the study area ( $\delta\text{D}=7.73 \delta^{18}\text{O}+13.03$ ,  $n=268$ ,  $R^2 = 0.95$ ,  $p < 0.001$ ) was similar to the Global Meteoric Water Line (GMWL:  $\delta\text{D} = 8\delta^{18}\text{O}+10$ , Figure 2). In contrast, the slope and intercept of linear regression line between  $\delta\text{D}$  and  $\delta^{18}\text{O}$  for all river waters (EWL:  $\delta\text{D} = 4.23\delta^{18}\text{O} - 9.94$ ,  $n= 308$ ,  $R^2 = 0.63$ ,  $p < 0.001$ ) were considerably lower than those of GMWL and LMWL of precipitation (Figure 4a). The slopes and intercepts of EWL

for river waters ranged from 3.78 to 5.08, and from -13.12 ‰ to -2.93 ‰ in three sub-catchments, respectively (Figure 3b). The largest slope and intercept of EWL were observed in HS catchment. Moreover, the d-excess of precipitation exhibited significant temporal heterogeneity, ranging from -6.37 ‰ to 24.69 ‰ with an arithmetic mean of 13.62 ‰. The d-excess values were lowest in summer and highest in winter. However, the mean d-excess values (mean  $\pm$  1SD) of river water in HK (14.99  $\pm$  5.42 ‰) and HS (15.43  $\pm$  3.03 ‰) watershed were greater than precipitation d-excess value, respectively (Table 2). The mean d-excess values of river in FX (11.83  $\pm$  6.03 ‰) are lower compared with mean precipitation d-excess. In terms of the correlation between  $\delta^{18}\text{O}$  and d-excess, river water in HK watershed exhibits the significant relationship ( $p < 0.01$ ), followed by FX, while HS show a weaker correlation between  $\delta^{18}\text{O}$  and d-excess (Figure 3c).

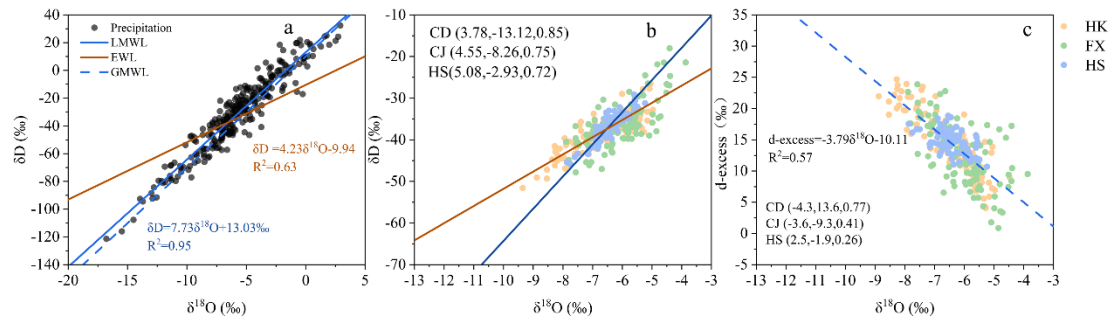

Figure 3 Linear regression relationships between  $\delta\text{D}$  and  $\delta^{18}\text{O}$  for (a) precipitation, (b) river water and (c) plot of d-excess versus  $\delta^{18}\text{O}$  for river water. Blue line represented the local meteoric water line (LMWL) in (a); Yellow lines represented regression lines for surface water samples in (b); blue dot-dash line represented the Global Meteoric Water Line (GMWL) expressed as  $\delta\text{D} = 8\delta^{18}\text{O} + 10$ ; The first, second, and third positions within the parentheses represented the slope, intercept, and R-squared value of three specific sub-catchments (HK, FX, and HS), respectively.

### 3.2 Young water fraction ( $F_{yw}$ ) and new water fraction ( $F_{new}$ ) estimation

As shown in Figure 4, the  $\delta\text{D}$  in precipitation and river water exhibited remarkable periodicity; its seasonal variation trend can be well fitted with a sine-wave curve. Notably, the curve fit was least satisfactory in the FX catchment ( $R^2 = 0.21$ ) and most effective in the HK catchment ( $R^2 = 0.41$ ). The sine regression models of both precipitation and river water were statistically significant ( $p < 0.001$ ). Precipitation sinusoidal waves peaked in March and reached their lowest points in September, exhibiting the most significant seasonal fluctuation with the highest amplitude. Meanwhile,

sinusoidal waves in river water from different catchments were dampened to varying degrees compared to precipitation. Figure 4 illustrated the fitted phase shift ( $\phi$ ) of  $\delta D$  in precipitation and river water. The fitted  $\phi$  values for river water are consistently larger than that of precipitation, indicating a time lag between the signal of river water and precipitation input. The amplitude values in three sub-catchments range from 1.2 to 3.7, which is associated with the estimated  $\tau_{yw}$  and  $F_{yw}$  (Table 3). The range of  $F_{yw}$  and  $\tau_{yw}$  spans from 0.07 to 0.21, and from 0.1 to 0.19 years, respectively. Among them, the HS catchment has the lowest  $F_{yw}$ , while the HK catchment has the highest  $F_{yw}$ . The transit-time distribution of river water is determined by the shape factor ( $\alpha$ ), which ranges from 0.06 to 1.03 (Table 3).

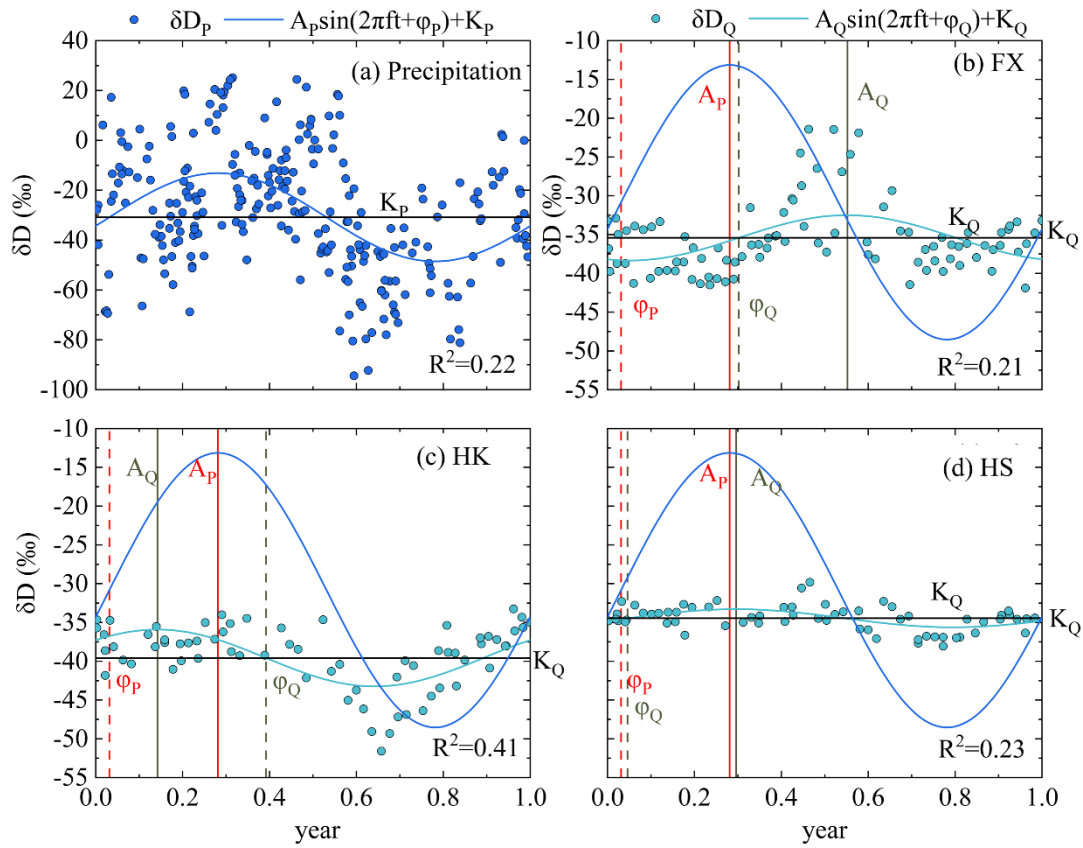

Figure 4. Annual-cycle-normalized sinusoidal cycles of both precipitation (a) and river waters (b–d) fitted by  $\delta D$  data for three sub-catchments.  $A_p$  and  $A_Q$ ,  $\phi_p$  and  $\phi_Q$ ,  $K_p$  and  $K_Q$  represented the amplitudes, phase shifts and vertical shifts of sine-wave curve fitted by precipitation (subscript p) and river water (subscript Q), respectively.

Table 3 Summary of all the relevant parameters estimated for three sub-catchments



| Sub-catchments | $A_Q \pm SE$  | $\phi_Q \pm SE$ | $F_{yw\_all} \pm SE$ | $\alpha \pm SE$ | $\tau_{yw} \pm SE$ (yr) |
|----------------|---------------|-----------------|----------------------|-----------------|-------------------------|
| HS             | $1.2 \pm 0.2$ | $-0.1 \pm 0.1$  | $0.07 \pm 0.01$      | $0.06 \pm 1.3$  | $0.1 \pm 0.07$          |
| HK             | $3.7 \pm 0.3$ | $0.7 \pm 0.1$   | $0.21 \pm 0.02$      | $0.58 \pm 2.7$  | $0.15 \pm 0.04$         |
| FX             | $2.9 \pm 0.1$ | $1.2 \pm 0.1$   | $0.17 \pm 0.02$      | $1.03 \pm 2.9$  | $0.19 \pm 0.12$         |

Notes:  $A_Q$ ,  $\phi_Q$  represent the amplitudes, phase shifts of sine-wave curve fitted by river water. Anticipating variability in  $F_{yw}$  over time, Figure 5 shows the distribution of unweighted ( $F_{yw\_36}$ ) and flow-weighted ( $F_{yw\_36}^*$ ) young water fraction values, using a 1-year window shifted at 1-month intervals. Notably, the uncertainty associated with the time-variable results was greater than that of the  $F_{yw\_all}$  results (Figure 5 and Table 3). Moreover, both  $F_{yw\_36}^*$  results and  $F_{yw\_36}$  results closely mirrored the  $F_{yw\_all}$  values, with HK catchment registering the highest  $F_{yw}$  and the HS catchment the lowest  $F_{yw}$ . Generally, our data indicate low and tightly distributed unweighted  $F_{yw}$  but higher and more broadly distributed flow-weighted  $F_{yw}$ . Specifically, river water in the HK watersheds showed a relatively tight distribution of unweighted and flow-weighted  $F_{yw}$ , while the HS catchment demonstrated a relatively broader distribution of unweighted and flow-weighted  $F_{yw}$ . Additionally, the FX catchments displayed the highest temporal variability in  $F_{yw\_36}^*$  and  $F_{yw\_36}$ .

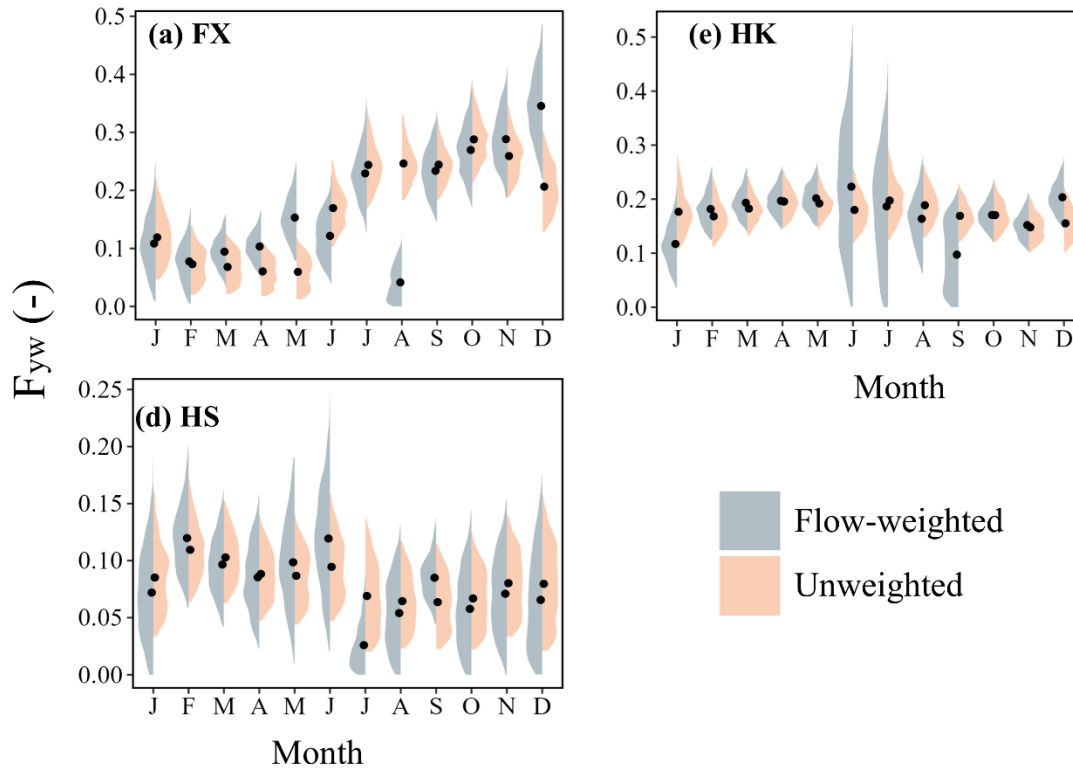

Figure 5 Flow-weighted  $F_{yw\_36}^*$  (blue) and unweighted  $F_{yw\_36}$  (orange) of three sub-catchments. The shape represented the probability density of young water fraction, the black line represented the 95%

confidence interval and red line represents mean value.

The range of  $F_{\text{new}}$  based on d-excess calculation varied from 0.09 to 0.27 (Table 4). Among these values, the HS catchment displayed the lowest  $F_{\text{new}}$ , while the highest  $F_{\text{new}}$  value was found in FX catchment. In contrast,  $F_{\text{new}}$  based on  $\delta\text{D}$  calculation ranged from 0.006 to 0.03, and its Pearson correlation coefficient (0.006 to 0.15) was significantly lower compared to that d-excess calculation (Table 4).

Table 4 Spatial variation of  $F_{\text{new}}$  based on the calculation of d-excess and  $\delta\text{D}$

| Catchments | $F_{\text{new\_d-excess}}$ | Pearson'r | $F_{\text{new\_}\delta\text{D}}$ | Pearson'r |
|------------|----------------------------|-----------|----------------------------------|-----------|
| HK         | 0.19                       | 0.47      | 0.006                            | 0.007     |
| FX         | 0.27                       | 0.4       | 0.03                             | 0.15      |
| HS         | 0.09                       | 0.3       | 0.015                            | 0.13      |

## 4. Discussion

### 4.1 Spatial-temporal variations of stable isotopes in river water

Stable water isotopes serve as robust recorders to identify crucial catchment processes such as evaporation, transpiration, recycling, and mixing, and to assess catchment water balance (Wu et al., 2021). In this study, the spatial heterogeneity of river water isotopes likely reflects variations in local surface evaporation and differences in recharge sources across catchments (Li et al., 2020; Wang et al., 2022; Wu et al., 2017). The isotopic data of river water in the study area were scattered along both sides of the LMWL (Figure 3), indicating that river water may be of meteoric origin (Bugna et al., 2020). Furthermore, the  $\delta^{18}\text{O}$  and  $\delta\text{D}$  data point distribution of samples from a single small catchment was relatively concentrated (Figure 3b), indicating that all the river water in each catchment originates from the same water source or undergoes similar hydrological processes. The variability in isotopic composition of precipitation was larger than that of river water, illustrating that the damping of the precipitation signatures due to mixing and dispersion within the subsurface. Besides, some overlap of the  $\delta^{18}\text{O}$  and  $\delta\text{D}$  data points occurs for two closely adjacent catchments, which can be attributed to the high similarity in their climatic and geographical features (Bhat et al.,

2022). However, the slope and intercept of the EWL were quite different from those of the LMWL. This discrepancy suggests that the linear regression between  $\delta D$  and  $\delta^{18}O$  in surface waters reflects, to some extent, the local evaporation condition (Shi et al., 2019). Therefore, river water in the study area experienced a higher degree of evaporation.

Precipitation d-excess is strongly influenced by the relative humidity of the moisture source, which changes with varying surface water temperatures and subsequent alterations in evaporation rates (Zhengyu and Matthew, 2021). This is the main reason for the time variability of precipitation d-excess (Table 2). The lower d-excess in summer precipitation may be attributed to higher summer temperatures leading to increased secondary evaporation of raindrops (Natali et al., 2022). In addition, because of kinetic fractionation processes, evaporation preferentially removes the light isotopes and leaves heavy isotopes in the residue liquid phase, resulting in a prominent isotopic enrichment of heavy isotopes in the remaining waters (Mao et al., 2021). Consequently, river water samples that experienced evaporation were mainly distributed along the evaporation line (Figure 3b), which has a lower slope ( $<8$ ). Moreover, the d-excess values of the remaining water will decrease progressively, showing a negative correlation with the  $\delta^{18}O$  values (Soldatova et al., 2016; Wu et al., 2017). As shown in Figure 3c, the correlation between d-excess and  $\delta^{18}O$  in the HS catchments is poor. On the contrary, d-excess of river water in the HK and FX catchments have a good correlation with  $\delta^{18}O$  values, indicating that river waters in the HK and FX, catchments are significantly affected by evaporative fractionation.

#### **4.2 Water age dynamics and its comparison of water age using different approaches**

In this study, the isotopic compositions from adjacent sub-catchments show differences, and the goodness of fit of regression curves varies greatly, with  $R^2$  values ranging from 0.21 to 0.41 (Figure 4). These differences reflect the seasonal variations caused by the dominant runoff flow path and storage capacity within the catchment (Herms et al., 2019). During wet conditions, once these flow paths become activated, pre-event and event water can be rapidly routed to the catchment outlet, temporarily masking seasonal variations in streamflow isotope data (Stockinger et al., 2016; Zhang et al., 2021). Additionally, as the isotopic composition of groundwater is generally constant, the

amplitude of isotopes in river water will be weakened when groundwater feeds river water (Murgulet et al., 2016). These combined factors contribute significantly to the spatial heterogeneity of  $F_{yw}$  and  $\tau_{yw}$  within the catchment. Besides, Table 2 lists the relatively low uncertainty ranges of  $F_{yw}$  and  $\tau_{yw}$ , indicating that the sampling period and high-sampling interval of river water (2 years and 7-day intervals) were appropriate for this study. The average  $F_{yw}$  and  $\tau_{yw}$  values are close to the global assessment by Jasechko et al. (2016), with  $F_{yw}$  estimated to be between 4% and 53% for 10%-90% range, and a  $\tau_{yw}$  of streamflow of 3 months. Recent studies calculated the river water  $F_{yw}$  for several subtropical catchments, resulting in values of 21% (Xiao et al., 2022), 14%~35% (Hu et al., 2020), 31% (Zhang et al., 2020), and 29% (Gou et al., 2022), which are consistent with the results of the study. Estimated  $F_{yw}$  contributions suggest that the majority (on average ~80%) of total streamflow may originate from slow subsurface lateral flow and groundwater. Besides, the shape factor ( $\alpha$ ) values for HS and HK, river water were less than 1, indicating a relatively rapid response to the input signal, while the  $\alpha$  values for FX and PX were greater than 1.0, indicating a more attenuated response. Except in the HS watershed where the fitted  $\phi$  value is similar between precipitation and river water, the  $\phi$  values of river water are all larger than those of precipitation. This indicates that a time lag exists between river water and precipitation. This lag occurs because precipitation contributes to the river not only through direct flow but also through delayed inputs like interflow and groundwater flow, causing a phase time lag (Xia et al., 2023).

Fitting a single sine wave to multi-year data oversimplifies the inter-annual variability in meteoric and streamflow isotope data, while annual sine waves better capture this variability (Stockinger et al., 2019). Considering inter-annual amplitude differences, our data indicate low and tightly distributed unweighted  $F_{yw}$  in the HS catchment, but higher and equally tightly distributed unweighted  $F_{yw}$  in the HK catchment. These results could be attributed to both catchments having higher storage capacity, resulting in less noticeable interannual variability in  $F_{yw}$ . Additionally, the dominance of fast flow paths in HK catchment aids in the generation of young water. Similarly, the highest temporal variability in unweighted  $F_{yw}$  of the FX catchment can be ascribed to different runoff flow paths activated at interannual scales. Flow weighting is known to have an effect on  $F_{yw}$  at sites with relatively large variations in discharge (von Freyberg et al., 2018). In this study, flow-

weighted  $F_{yw}$  are generally higher than the unweighted  $F_{yw}$ , but differences between them are not significant (Figure 5). Trinh et al (2020) found that the flow-weighted and unweighted  $F_{yw}$  in the Day River Catchment in northern Vietnam were similar, characterized by  $51\pm19\%$  and  $52\pm36\%$ , respectively. This may reflect the similarity in water age distribution between dry and wet periods in tropical and subtropical catchments. As shown in (Gou et al., 2022), despite differences in the age distribution of streamflow between the winter and summer monsoon periods, there is a consistent preference for the preferential release of young water. Additionally, the distribution of flow-weighted  $F_{yw}$  is broader than that of unweighted  $F_{yw}$  in the HS and HK catchments. This finding suggests that flow-weighted  $F_{yw}$  can take the impact of anomalous events into account, therefore capturing some important hydrological characteristics of the catchment (Trinh et al., 2020). Overall, there's a higher temporal variability in  $F_{yw}$  compared to its spatial variability. This indicates that while intrinsic catchment characteristics have some impact on  $F_{yw}$ , it is likely primarily controlled by meteorological factors.

While the assumption of collinear behavior between  $\delta^{18}O$  and  $\delta D$  is common, Bansah and Ali (2019) have suggested that inconsistencies in the  $F_{yw}$  calculations can arise when using  $\delta^{18}O$  and  $\delta D$  (Bansah and Ali, 2019). This is not surprising, given that isotopic fractionation effects are known to affect  $\delta D$  more significantly. In this study, regression analysis revealed that using d-excess provided a better fit than using  $\delta D$  (Table 4). The differences in results generated by the two fingerprints are likely attributable to strong evaporative processes (Figure 3c). A similar study found that d-excess is a reliable tracer for tracing recharged water, especially resulting from evaporation during infiltration, which imparts a characteristic isotopic trend reflecting local climatic conditions (Wu et al., 2017). Therefore, it is plausible that the values of  $F_{new}$  calculated using d-excess above the values based on  $\delta D$ , potentially represent the new water that experienced evaporative fractionation loss within 1 to 2 weeks period. Besides, evaporation clearly has a greater impact on new water compared to old water (Table 4), possibly because the evaporation process slowed down the mixing of new water in the topsoil and old water in the lower layer (Chen et al., 2024).

### 4.3 Time-variable $F_{yw}$ and $F_{new}$ drivers

In traditional statistical frameworks, the inclusion of additional contributing drivers typically correlates with enhanced predictability and accuracy. Therefore, this study considered various potential predictors to identify those that significantly affect the riverine time-variable  $F_{yw}$ . The striking difference between the more powerful and less powerful predictors is illustrated in Figure 6. Meteorological variables such as potential evapotranspiration (PET) and precipitation (P) were among the most important drivers in each model, explaining the strong temporal heterogeneity observed in  $F_{yw}$ , as climate not only influences the underlying surface landscape but also fundamentally governs existing underlying surface characteristics, which in turn alters watershed hydrological characteristics. However, there is no significant relationship between the precipitation and  $F_{yw}$ . Part of the reason may be owing to limited data availability for stream water-age analysis, but it is more likely that this reveals the indirect influence of precipitation and evapotranspiration on the young water generation. Furthermore, we employed Shapley Additive Explanations (SHAP) to quantify the contributions of different driving factors to the young and new water fraction. The results highlight the influence of watershed attributes (e.g., river area, slope, and cropland proportion), and the correlations reflected by SHAP values are consistent with the Pearson correlation results (Figure 6a). Although meteorological factors (e.g., precipitation and evapotranspiration) are important drivers, their correlations with the young and new water fraction are not statistically significant, but Discharge density (DS) and river area (RA) demonstrates strong importance in both the RF and SHAP models. This reflects the integration power of the riparian zone, which efficiently mix waters with different water ages, potentially weakening the direct influence of precipitation on stream new and young water. Furthermore, the percentage of forest exhibits relatively strong predictive power for both  $F_{yw}$  and  $F_{yw}^*$ , as indicated by the results from the Random Forest model and SHAP additive explanations. This may be attributed to the enhanced soil infiltration caused by forest root systems, which lengthen flow paths and consequently reduce  $F_{yw}$  (Hu et al., 2020). This mechanism is likely a key reason why the  $F_{yw}$  in the study area is lower than the global average value of 26% (Jasechko et al., 2016).

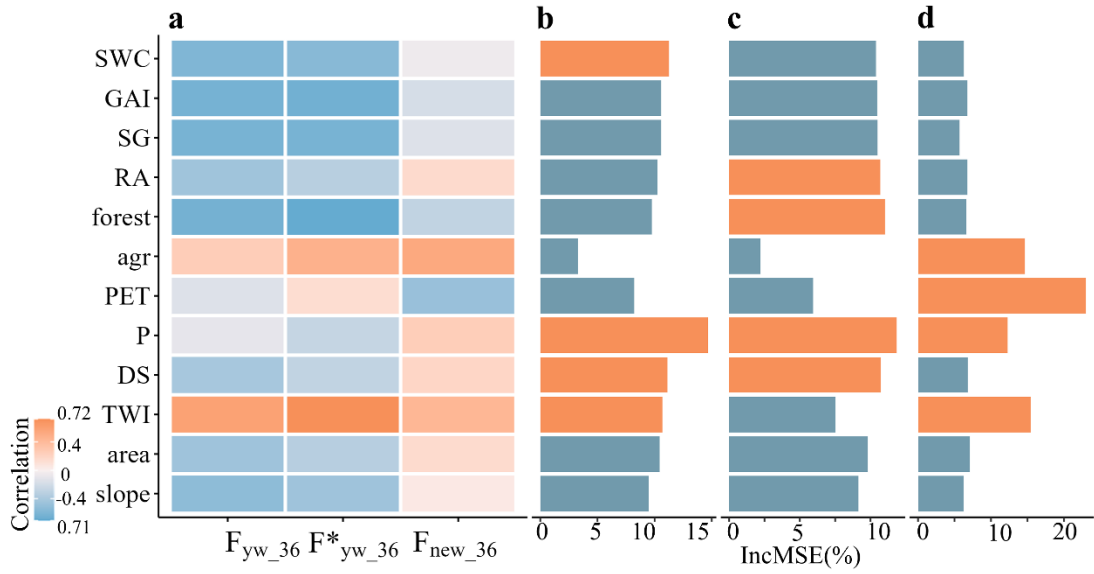

Figure 6 Heatmap of correlations of  $F_{yw\_36}$ ,  $F^*_{yw\_36}$  and  $F_{new\_36}$  with potential drivers (a) and the corresponding driver contributions (b, c, and d). The horizontal bars illustrate the mean variable importance for predicted drivers of  $F_{yw\_36}$ ,  $F^*_{yw\_36}$  and  $F_{new\_36}$  obtained in 1,000 random forest runs (b, c, and d), with orange bars highlighting the top four most significant drivers. Predicted drivers included in the analysis are mean annual potential evapotranspiration (PET), soil water content (SWC), Global Aridity Index (GAI), River Area (RA), percentage of agriculture (agr), Discharge density(DS), catchment area (area), Topographic Wetness Index (TWI), Stream Gradient(SG), slope (slope), mean annual precipitation (P), percentage of forest (forest).

The prediction results for the drivers of  $F_{yw}$  and  $F^*_{yw}$  show consistent performance between the RF and SHAP models, both emphasizing the importance of DS and RA, further supporting the assumption that the watershed tends to release young water in both wet and dry seasons due to the regulatory function of the riparian zones. Unlike the drivers of  $F_{yw}$ , which emphasize the influence of forest cover, the drivers of  $F_{new}$  highlight the greater importance of cropland area, as evidenced by the prediction results from both the RF and SHAP models. Specifically, both the percentage of agriculture (agr) and PET individually exhibit negative contributions to  $F_{new}$ , indicating increased water loss through evapotranspiration and reduced infiltration. However, their combined Shapley value (0.01) is positive, suggesting that in regions with both high PET and extensive cropland, irrigation practices may enhance water input and rapidly replenish the system with new water.

Additionally, the weaker influence of RA and DS suggests that watershed convergence has a limited impact on  $F_{new}$ . Consistent with previous studies (Jasechko et al., 2016; Ye et al., 2022), the influence of basin slope on  $F_{yw}$  appears to be strongly negatively correlated, because steep slopes in mountainous catchments promote deeper infiltration flow paths, thereby reducing  $F_{yw}$  (Jasechko et al., 2016).

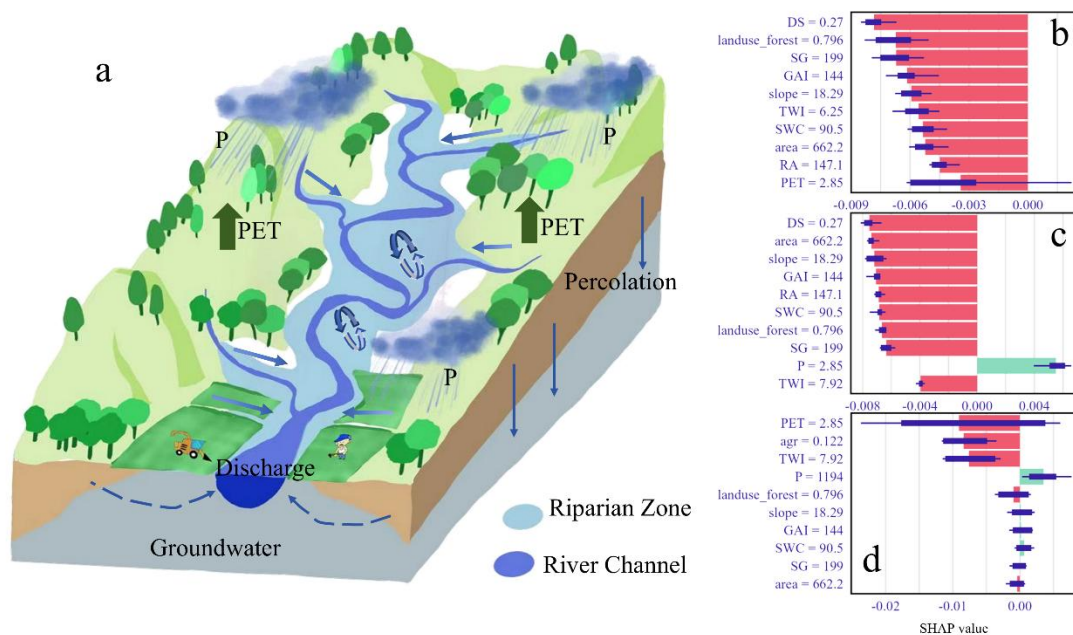

Figure 7 Conceptual diagram (a) and the contribution of the most important variables in predicting  $F_{yw}$  (b),  $F_{yw}^*$  (c) and  $F_{new}$  (d), as estimated by the SHAP values



569

## 570 **5. Conclusions**

571 In this study, high-resolution time series of stable isotope data were firstly collected to estimate  
572 spatiotemporal variations of young and new water fraction in three headwater sub-catchments from  
573 the upper reaches of Xiu River, located within the Poyang Lake catchment of South-Central China  
574 using the sine-wave approach and mixing end-members model. The  $\delta D$  and  $\delta^{18}O$  of river water was  
575 mainly scattered around the LMWL ( $\delta D = 7.73\delta^{18}O + 13.03$ ,  $R^2 = 0.95$ ,  $p < 0.001$ ), indicating that river  
576 water primarily originated from atmospheric precipitation. Additionally, both the slope and intercept  
577 of EWL ( $\delta D = 4.23\delta^{18}O - 9.94$ ,  $R^2 = 0.63$ ,  $p < 0.001$ ) were lower than those of the LMWL.  
578 Furthermore, river water was characterized by a lower riverine  $F_{yw}$ , which exhibited high  
579 spatiotemporal heterogeneity. The interplay of various controls on time-variable  $F_{yw}$  and  $F_{new}$  was  
580 confirmed in a random forest analysis, revealing that precipitation ( $12.94 \pm 1.51\%$ ) and potential  
581 evapotranspiration ( $12.38 \pm 9.25\%$ ) were the main drivers that explained the time-variable  $F_{yw}$  and  
582  $F_{new}$  in the study area. Precipitation serves as the source of young and new water, while  
583 evapotranspiration reduces the amount of water along flow paths, thus affecting both young and  
584 new water fraction. Spatially, different land use types were identified as the primary drivers of the  
585 significant spatial heterogeneity in  $F_{new}$  and  $F_{yw}$ . These land use types determined the generation of  
586 young and new water by altering the proportion of different flow paths and the amount of  
587 undersurface water storage, with a greater impact on water in faster flow paths. Furthermore, the  
588 SHAP analysis revealed a negative correlation between both discharge density and river area with  
589  $F_{yw}$ , and revealed a positive interaction effect between agricultural area and PET on  $F_{new}$ , which  
590 suggested that riparian zones regulated and mix young water, while human conversion of these  
591 zones into agricultural land could weaken this impact. This study offers novel insights into the  
592 evolution of riverine water age, enhancing our understanding of catchment-scale hydrological  
593 processes and guiding the management and protection of water resources in subtropical headwater  
594 regions.

595

596 **Author contributions:**

Conceptualization: KL. Methodology: KL and HW. Formal analysis: KL and HW. Data curation: HF, RL, and MD. Writing-original draft: KL and HW. Writing-review and editing: HW, HF, RL, MD, JL, CF, CZ, GS, RR, and XX. Visualization: KL. Supervision: KL, HW and HF.

#### **Data and code availability statement**

The data and code that support the findings of this study are available from the corresponding author upon reasonable request.

#### **Acknowledgement**

This work was supported by National Natural Science Foundation of China, China (U2240219, 42201105, and 42071145), Qinghai University Research Ability Enhancement Project (2025KTST03), and Science and Technology Planning Project of NIGLAS (NIGLAS2022GS10).

#### **Competing interests**

The contact author has declared that none of the authors has any competing interests.

#### **References**

- Bagheri, R., Bagheri, F., Karami, G.H., Jafari, H., 2019. Chemo-isotopes ( $^{18}\text{O}$  &  $^2\text{H}$ ) signatures and HYSPLIT model application: Clues to the atmospheric moisture and air mass origins. *Atmospheric Environment*: 116892.
- Bansah, S., Ali, G., 2019. Streamwater ages in nested, seasonally cold Canadian watersheds. *Hydrological Processes*, 33(4): 495-511.
- Benettin, P., Fovet, O., Li, L., 2020. Nitrate removal and young stream water fractions at the catchment scale. *Hydrological Processes*, 34(12): 2725-2738.
- Bhat, M.A., Zhong, J., Dar, T., Kumar, A., Li, S.-L., 2022. Spatial distribution of stable isotopes in surface water on the upper Indus River basin (UIRB): Implications for moisture source and paleoelevation reconstruction. *Applied Geochemistry*, 136: 105137.

- Brantley, S.L. et al., 2017. Reviews and syntheses: on the roles trees play in building and plumbing the critical zone. *Biogeosciences*: 1-41.
- Bugna, G.C., Grace, J.M., Hsieh, Y.-P., 2020. Sensitivity of using stable water isotopic tracers to study the hydrology of isolated wetlands in North Florida. *Journal of Hydrology*: 124321.
- Burt, E.I., Goldsmith, G.R., Cruz-de Hoyos, R.M., Ccahuana Quispe, A.J., West, A.J., 2023. The seasonal origins and ages of water provisioning streams and trees in a tropical montane cloud forest. *Hydrology and Earth System Sciences*, 27(22): 4173-4186.
- Chen, X. et al., 2024. Effects of soil heterogeneity and preferential flow on the water flow and isotope transport in an experimental hillslope. *Science of The Total Environment*, 917: 170548.
- Clow, D.W., Mast, M.A., Sickman, J.O., 2018. Linking transit times to catchment sensitivity to atmospheric deposition of acidity and nitrogen in mountains of the western United States. *Hydrological Processes*, 32(16): 2456-2470.
- Cotton, J. et al., 2018. A bioavailable strontium isoscape for Western Europe: A machine learning approach. *Plos One*, 13(5): 0197386.
- Craig, H., 1961. Isotopic Variations in Meteoric Waters. *Science*: 1702.
- Erdélyi, D., Kern, Z., Nyitrai, T., Hatvani, I.G., 2023. Predicting the spatial distribution of stable isotopes in precipitation using a machine learning approach: a comparative assessment of random forest variants. *GEM - International Journal on Geomathematics*, 14(1): 14.
- Gallart, F. et al., 2020. Investigating young water fractions in a small Mediterranean mountain catchment: Both precipitation forcing and sampling frequency matter. *Hydrological Processes*, 34(17): 3618-3634.
- Gentile, A. et al., 2023. Towards a conceptualization of the hydrological processes behind changes of young water fraction with elevation: a focus on mountainous alpine catchments. *Hydrology and Earth System Sciences*, 27(12): 2301-2323.
- Gou, J. et al., 2022. Seasonal variation of transit time distribution and associated hydrological processes in a Moso bamboo watershed under the East Asian monsoon climate. *Journal of Hydrology*.
- Guan, Y. et al., 2022. Tracing anomalies in moisture recycling and transport to two record-breaking

652 droughts over the Mid-to-Lower Reaches of the Yangtze River. *Journal of Hydrology*:  
653 127787.

654 Harman, C.J., 2015. Time-variable transit time distributions and transport: Theory and application  
655 to storage-dependent transport of chloride in a watershed. *Water Resources Research*, 51(1):  
656 1-30.

657 Herms, I. et al., 2019. Contribution of isotopic research techniques to characterize high-mountain-  
658 Mediterranean karst aquifers: The Port del Comte (Eastern Pyrenees) aquifer. *Science of*  
659 *The Total Environment*, 656: 209-230.

660 Hu, M. et al., 2020. Assessment of streamflow components and hydrologic transit times using stable  
661 isotopes of oxygen and hydrogen in waters of a subtropical watershed in eastern China.  
662 *Journal of Hydrology*.

663 Ide, K. et al., 2020. Changes of groundwater flow systems after the 2016 Mw 7.0 Kumamoto  
664 earthquake deduced by stable isotopic and CFC-12 compositions of natural springs. *Journal*  
665 *of Hydrology*(583): 124551.

666 Jasechko, S., Kirchner, J.W., Welker, J.M., McDonnell, J.J., 2016. Substantial proportion of global  
667 streamflow less than three months old. *Nature Geoscience*, 9(2): 126-129.

668 Kim, M. et al., 2016. Transit time distributions and StorAge Selection functions in a sloping soil  
669 lysimeter with time-varying flow paths: Direct observation of internal and external  
670 transport variability. *Water Resources Research*, 52(9): 7105-7129.

671 Kirchner, J.W., 2019. Quantifying new water fractions and transit time distributions using ensemble  
672 hydrograph separation: theory and benchmark tests. *Hydrology and Earth System Sciences*,  
673 23(1): 303-349.

674 Li, C. et al., 2020. Seasonal variability of stable isotopes in the Changjiang (Yangtze) river water  
675 and its implications for natural climate and anthropogenic impacts. *Environmental Sciences*  
676 *Europe*(32): 1-13.

677 Li, Y., Zhang, Q., Werner, A.D., Yao, J., Ye, X., 2016. The influence of river-to-lake backflow on  
678 the hydrodynamics of a large floodplain lake system (Poyang Lake, China). *Hydrological*  
679 *Processes*(31): 117-132.

680 Lutz, S.R. et al., 2018. Spatial Patterns of Water Age: Using Young Water Fractions to Improve the

681 Characterization of Transit Times in Contrasting Catchments. *Water Resources Research*,  
682 54(7): 4767-4784.

683 Mao, H., Wang, G., Shi, Z., Liao, F., Xue, Y., 2021. Spatiotemporal Variation of Groundwater  
684 Recharge in the Lower Reaches of the Poyang Lake Basin, China: Insights From Stable  
685 Hydrogen and Oxygen Isotopes. *Journal of Geophysical Research: Atmospheres*, 126(6):  
686 e2020JD033760.

687 Morissette, O., Trueman, C.N., Sturrock, A.M., Geffen, A.J., Shirai, K., 2023. Limited evidence for  
688 species-specific sensitivity of temperature-dependent fractionation of oxygen stable isotope  
689 in biominerals: A meta-analysis. *Methods in Ecology and Evolution*(14): 1719-1731.

690 Murad, A.A., Mirghni, F.M., 2011. Isotopic variations of oxygen and hydrogen in groundwater of  
691 carbonate aquifer in an arid environment. *Arabian Journal of Geosciences*(5): 1459-1468.

692 Murgulet, D., Murgulet, V., Spalt, N., Douglas, A., Hay, R.G., 2016. Impact of hydrological  
693 alterations on river-groundwater exchange and water quality in a semi-arid area: Nueces  
694 River, Texas. *Science of the Total Environment*(572): 595-607.

695 Natali, S., Doveri, M., Gianecchini, R., Baneschi, I., Zanchetta, G., 2022. Is the deuterium excess  
696 in precipitation a reliable tracer of moisture sources and water resources fate in the western  
697 Mediterranean? New insights from Apuan Alps (Italy). *Journal of Hydrology*(614): 128497.

698 Shi, M. et al., 2019. Stable Isotope Composition in Surface Water in the Upper Yellow River in  
699 Northwest China. *Water*, 11(11): 967.

700 Shi, X. et al., 2023. Tree species richness and functional composition drive soil nitrification through  
701 ammonia-oxidizing archaea in subtropical forests. *Soil Biology and Biochemistry*, 187:  
702 109211.

703 Soldatova, E.A., Sun, Z., Guseva, N.V., 2016. Isotopic composition ( $\delta^{18}\text{O}$  and  $\delta\text{D}$ ) of the shallow  
704 groundwater in the Poyang Lake basin. *IOP Conference Series: Earth and Environmental*  
705 *Science*.

706 Song, C. et al., 2017. Stable isotope variations of precipitation and streamflow reveal the young  
707 water fraction of a permafrost watershed. *Hydrological Processes*, 31(4): 935-947.

708 Speed, M., Tetzlaff, D., Hrachowitz, M., Soulsby, C., 2011. Evolution of the spatial and temporal  
709 characteristics of the isotope hydrology of a montane river basin. *Hydrological Sciences*

Journal, 56(3): 426-442.

Stockinger, M.P. et al., 2016. Tracer sampling frequency influences estimates of young water fraction and streamwater transit time distribution. *Journal of Hydrology*, 541: 952-964.

Stockinger, M.P., Bogen, H.R., Lücke, A., Stumpp, C., Vereecken, H., 2019. Time variability and uncertainty in the fraction of young water in a small headwater catchment. *Hydrology and Earth System Sciences*, 23(10): 4333-4347.

Trinh, A.D., Do, T.N., Panizzo, V.N., McGowan, S., Leng, M.J., 2020. Using stable isotopes to estimate young water fractions in a heavily regulated, tropical lowland river basin. *Hydrological Processes*, 34(22): 4239-4250.

Valdivielso, S., Vázquez-Suñé, E., Custodio, E., 2020. Origin and Variability of Oxygen and Hydrogen Isotopic Composition of Precipitation in the Central Andes: a Review. *Journal of Hydrology*(587): 124889.

von Freyberg, J., Allen, S.T., Seeger, S., Weiler, M., Kirchner, J.W., 2018. Sensitivity of young water fractions to hydro-climatic forcing and landscape properties across 22 Swiss catchments. *Hydrology and Earth System Sciences*, 22(7): 3841-3861.

Wang, L., Liu, W., Xu, Z., Zhang, J., 2022. Water sources and recharge mechanisms of the Yarlung Zangbo River in the Tibetan Plateau: Constraints from hydrogen and oxygen stable isotopes. *Journal of Hydrology*, 614: 128585.

Wang, S. et al., 2023. Insights into the streamwater age in the headwater catchments covered by glaciers and permafrost, Central Tibetan Plateau. *Science of The Total Environment*, 866: 161337.

Wu, H. et al., 2021. Stable isotope signatures of river and lake water from Poyang Lake, China: Implications for river–lake interactions. *Journal of Hydrology*, 592: 125619.

Wu, X., Wang, X.-S., Wang, Y., Hu, B.X., 2017. Origin of water in the Badain Jaran Desert, China: new insight from isotopes. *Hydrology and Earth System Sciences*, 21(9): 4419-4431.

Xia, C. et al., 2023. Stable isotopes reveal the surface water-groundwater interaction and variation in young water fraction in an urbanized river zone. *Urban Climate*, 51: 101641.

Xiao, D., Brantley, S.L., Li, L., 2021. Vertical Connectivity Regulates Water Transit Time and Chemical Weathering at the Hillslope Scale. *Water Resources Research*, 57(8).

- Xiao, X., Zhang, X., Wu, H., Zhang, C., Han, L., 2022. Stable isotopes of surface water and groundwater in a typical subtropical basin in south-central China: Insights into the young water fraction and its seasonal origin. *Hydrological Processes*.
- Ye, S. et al., 2022. The Variability of Stable Water Isotopes and the Young Water Fraction in a Mountainous Catchment. *CLEAN – Soil, Air, Water*, 50(7): 50.
- Zhang, Q. et al., 2018. Surface and subsurface water contributions to streamflow from a mesoscale watershed in complex mountain terrain. *Hydrological Processes*: 11469.
- Zhang, Z., Chen, X., Cheng, Q., Soulsby, C., 2020. Characterising the variability of transit time distributions and young water fractions in karst catchments using flux tracking. *Hydrological Processes*.
- Zhang, Z., Chen, X., Cheng, Q., Soulsby, C., 2021. Using StorAge Selection (SAS) functions to understand flow paths and age distributions in contrasting karst groundwater systems. *Journal of Hydrology*, 602: 126785.
- Zhengyu, X., Matthew, J.W., 2021. The competing effects of terrestrial evapotranspiration and raindrop re-evaporation on the deuterium excess of continental precipitation. *Earth and Planetary Science Letters*: 117120.
