# Supplementary figures and images for: Insights into spatiotemporal dynamics of riverine water age and its controlling factors in five contrasting subtropical headwater catchments, South-Central China using stable water isotopes
Source: Copernicus journal article supplement (doi:10.5194/egusphere-2025-1739), 2025-05-27

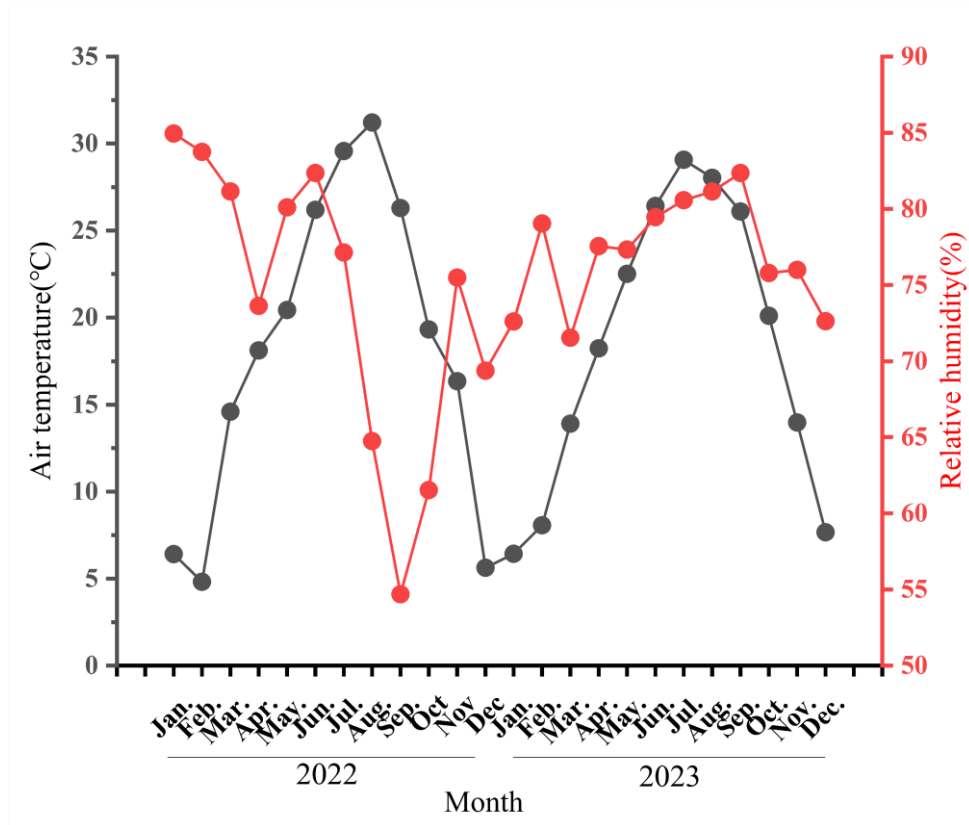

Figure S1 The average monthly air temperature and relative humidity in the study area

Supplement: Supplementary file 1 [file egusphere-2025-1739-supplement.pdf]
